# Supplementary material for: Black-to-transmissive electrochromic switching polymer films via solution co-processing
Source: Royal Society of Chemistry journal article supplement (doi:10.1039/c5nj03023d), 2016-01-01
Supplement: c5nj03023d1.pdf [file c5nj03023d1.pdf]

*Electronic Supplementary Information (ESI) to New J. Chem.*

**Black to transmissive electrochromic switching polymer films via solution co-processing**

**Zhangping Xu, Wenjing Wang, Jingchuan Wu, Sai Mi, Jianming Zheng and Chunye Xu\***

Hefei National Laboratory for Physical Sciences at Microscale, CAS Key Laboratory of Soft Matter Chemistry, Department of Polymer Science and Engineering, University of Science and Technology of China, Hefei 230026, PR China

\* Corresponding author: Tel.: +86 551 63603459.

Email: [chunye@ustc.edu.cn](mailto:chunye@ustc.edu.cn)

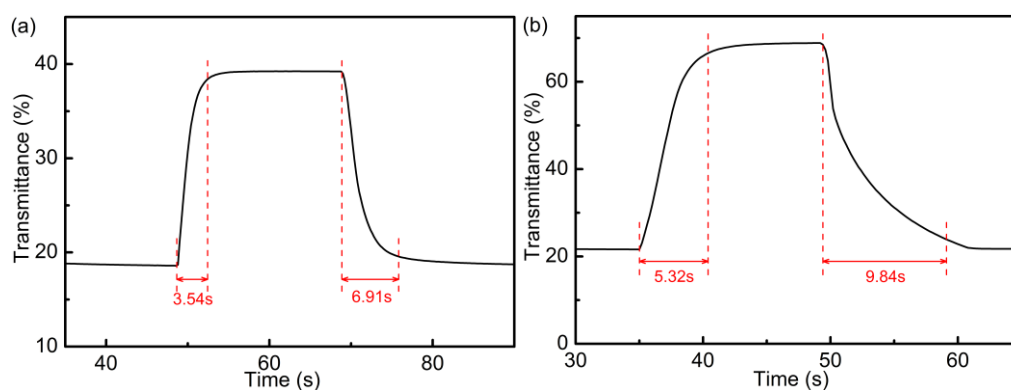

**Fig. S1.** Switching speed of (a) P1 (monitored at 748 nm) and (b) P2 (monitored at 540 nm). Measurements were performed in 0.1 M LiClO<sub>4</sub>/PC of films on ITO glasses electrodes, with Pt wire counter-electrode and Ag wire pseudo reference electrode.

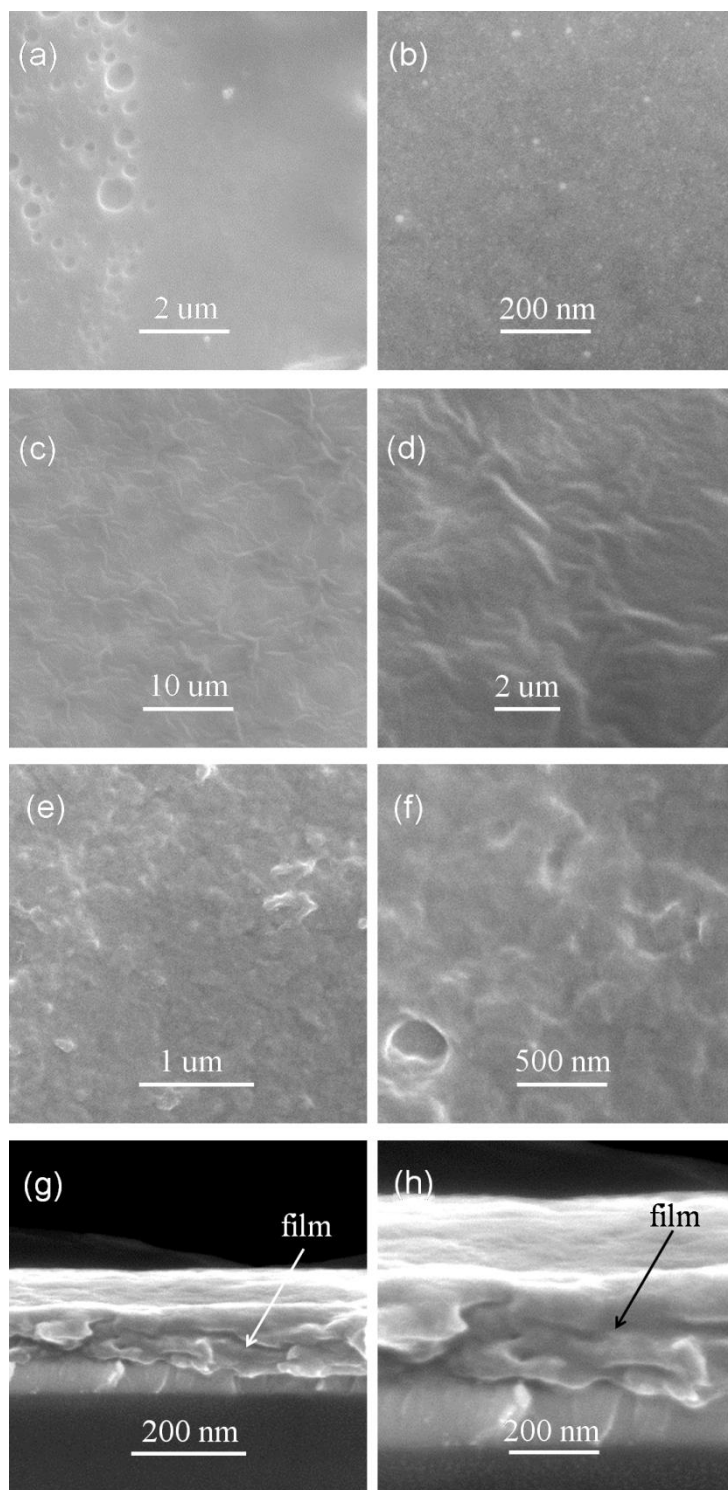

**Fig. S2.** Surface micrographs of the polymer films spray-cast onto ITO-coated glass slides: (a) and (b) for P1; (c) and (d) for P2 & (e-h) for B (g and h are cross-section views).
